# Supplementary material for: Exosome Secretion and Epithelial-Mesenchymal Transition in Ovarian Cancer Are Regulated by Phospholipase D
Source: MDPI journal article supplement (doi:10.3390/ijms232113286), 2022-10-31

## Supplementary data

**Table S1: Primer sequences**

| Gene        |         | Primer sequence (5' → 3')    |
|-------------|---------|------------------------------|
| E-cadherin  | Forward | GCCATCGCTTACACCATCCT         |
|             | Reverse | GGCACCTGACCCTTGTACGT         |
| Vimentin    | Forward | TCTGGATTCACTCCCTCTGGTT       |
|             | Reverse | CGTGATGCTGAGAAGTTTCGTT       |
| Fibronectin | Forward | GCGAGAGTGCCCCTACTACA         |
|             | Reverse | GTTGGTGAATCGCAGGTCA          |
| Periostin   | Forward | GTCTTTGAGACGCTGGAAGG         |
|             | Reverse | AGATCCGTGAAGGTGGTTTG         |
| ANRIL       | Forward | TGCTCTATCCGCCAATCAGG         |
|             | Reverse | GGGCCTCAGTGGCACATACC         |
| RPLP0       | Forward | CCAACTACTTCCTTAAGATCATCCAATA |
|             | Reverse | ACATGCGGATCTGCTGCA           |

**Figure S1: CD81 and Ponceau expression in exosomes extracted from OVCAR3 and OVCAR8 control cells**

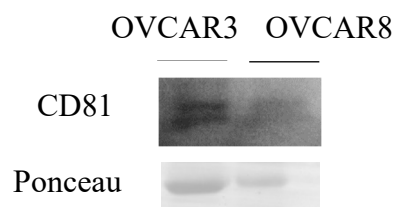

Supplement: s1 [file s1]
